# Supplementary material
Source: PubMed Central journal article supplement (PMC3574233)
Supplement: NIHMS430032-supplement-1_si_001.pdf [file NIHMS430032-supplement-1_si_001.pdf]

**Figure S2.**

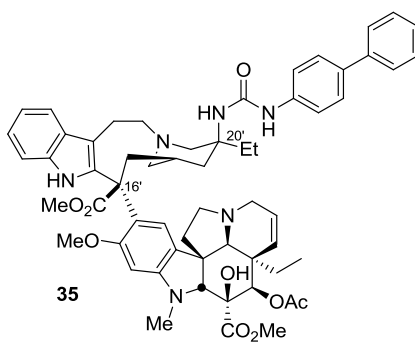

| Compound  | IC <sub>50</sub> (nM) |        |             |
|-----------|-----------------------|--------|-------------|
|           | L1210                 | HCT116 | HCT116/VM46 |
| <b>1</b>  | 6.0                   | 6.8    | 600         |
| <b>35</b> | 6.4                   | 6.9    | 470         |

**Figure S3.**

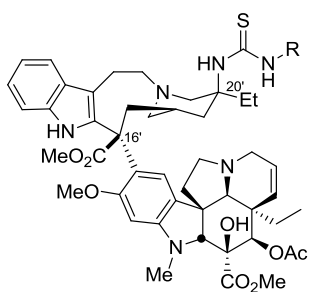

| Compound                                                                              | IC <sub>50</sub> (nM) |        |             |
|---------------------------------------------------------------------------------------|-----------------------|--------|-------------|
|                                                                                       | L1210                 | HCT116 | HCT116/VM46 |
| Vinblastine ( <b>1</b> )                                                              | 6.0                   | 6.8    | 600         |
| R = H ( <b>11</b> )                                                                   | 55                    | 7.7    | 2000        |
| R = C <sub>6</sub> H <sub>11</sub> ( <b>36</b> )                                      | 30                    | 20     | 520         |
| R = C <sub>6</sub> H <sub>5</sub> ( <b>37</b> )                                       | 50                    | 40     | 650         |
| R = CH <sub>2</sub> CH <sub>2</sub> (4-FC <sub>6</sub> H <sub>4</sub> ) ( <b>38</b> ) | 60                    | 60     | 750         |

**Figure S4.**

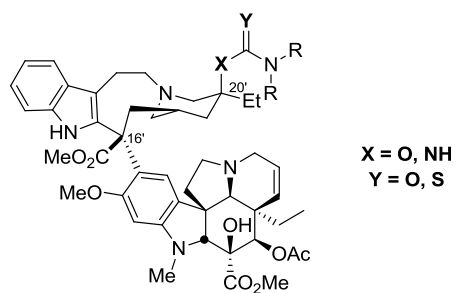

| Compound                                 | IC <sub>50</sub> (nM) |        |             |
|------------------------------------------|-----------------------|--------|-------------|
|                                          | L1210                 | HCT116 | HCT116/VM46 |
| Vinblastine (1)                          | 6.0                   | 6.8    | 600         |
| <b>X = NH, Y = O</b>                     |                       |        |             |
| R = H (11)                               | 40                    | 7.5    | 4400        |
| R = CH <sub>3</sub> (39)                 | 5.9                   | 2.8    | 80          |
| R = CH <sub>2</sub> CH <sub>3</sub> (40) | 8.3                   | 7.2    | 550         |
| R = Morpholine (41)                      | 5.3                   | 4.5    | 360         |
| R = Piperidine (42)                      | 5.5                   | 3.9    | 50          |
| <b>X = NH, Y = S</b>                     |                       |        |             |
| R = H                                    | 55                    | 7.7    | 2000        |
| R = CH <sub>3</sub> (43)                 | 7.8                   | 8.7    | 250         |
| <b>X = O, Y = O</b>                      |                       |        |             |
| R = CH <sub>3</sub> (44)                 | 5700                  | 4700   | 9100        |

**Figure S5.**

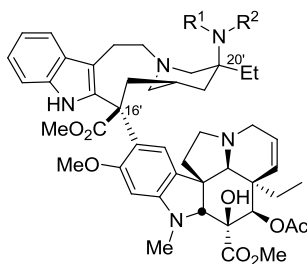

| Compound                                                 | IC <sub>50</sub> (nM) |        |             |
|----------------------------------------------------------|-----------------------|--------|-------------|
|                                                          | L1210                 | HCT116 | HCT116/VM46 |
| Vinblastine                                              | 6.0                   | 6.8    | 600         |
| R <sup>1</sup> and R <sup>2</sup> = H (7)                | 640                   | 600    | >10000      |
| R <sup>1</sup> = H R <sup>2</sup> = CH <sub>3</sub> (45) | 70                    | 60     | 8500        |
| R <sup>1</sup> and R <sup>2</sup> = CH <sub>3</sub> (46) | 1300                  | 980    | >10000      |
